# Supplementary material for: Systems-Based Approaches to Unravel Networks and Individual Elements Involved in Apple Superficial Scald
Source: Front Plant Sci. 2020 Feb 13;11:8. doi: 10.3389/fpls.2020.00008 (PMC7031346; doi:10.3389/fpls.2020.00008)
Supplement: Supplementary file 1 [file Table_1.xlsx]

## Sheet: Metabolites
	Supplementary Table 1: Apple 'Granny Smith' skin metabolites that affected by the treatments during cold stress, pre-symptomatic and symptomatic period.
	Complete Metabolite Name	Metabolite Group	Time Expected	Time Deviation	Matching Probability	Tag_Time_Index	Tag_Mass	Time_Group	Cold stress		Pre-symptomatic								Symptomatic
									Harvest		Control		1-MCP		Ozone		1-MCP+Ozone		Control		1-MCP		Ozone		1-MCP+Ozone
									Average	SE	Average	SE	Average	SE	Average	SE	Average	SE	Average	SE	Average	SE	Average	SE	Average	SE
	Alanine	Amino acids	208565	0.47	0.33	209567	116	23	0.0701253	0.00282267	0.0664863	0.00838508	0.051818	0.00607602	0.0540137	0.000975543	0.0495592	0.00260332	0.0272832	0.00287846	0.0452461	0.000577558	0.0251809	0.00260329	0.0387113	0.0043728
	Valine	Amino acids	271580	0.07	0.42	271792	144	75	0.00471721	0.000245902	0.00317529	0.000239395	0.011646	0.00128647	0.00261485	0.000161773	0.0103284	0.00119032	0.00430774	0.000358018	0.0135827	0.000385806	0.00250411	0.000167533	0.0113775	0.000638686
	Glycerol	Others	291783	0.02	0.48	291878	117	91	0.0223342	0.00258918	0.0391675	0.00352187	0.0204479	0.00156445	0.0155003	0.000470603	0.0168203	0.000957378	0.0282085	0.00180185	0.0271661	0.00459925	0.0151749	0.000931016	0.0203934	0.000113427
	Isoleucine	Amino acids	319193	-0.04	0.53	319068	158	116	0.0118138	0.000706833	0.0167542	0.00149906	0.0109226	0.000986926	0.0122561	0.000482673	0.0107981	0.000732182	0.0193059	0.000790694	0.0154665	0.00133721	0.0102908	0.00109424	0.0186907	0.00121018
	Phosphoric acid	Others	333520	-0.21	0.5	332821	225	126	0.0222645	0.00149604	0.0245987	0.000228803	0.025876	0.00127916	0.0265445	0.000564714	0.0281914	0.00104044	0.0259092	0.00146813	0.0253252	0.000651775	0.0317138	0.00156591	0.0312751	0.000204497
	Urea	Others	340357	-0.14	0.31	340121	189	130	0.00230369	0.000204349	0.0017559	9.87854e-05	0.00144781	0.000310591	0.000998795	3.15883e-06	0.00119751	0.00013066	0.00148232	0.000349282	0.00182775	0.000619696	0.000994633	4.37534e-05	0.000937295	6.69379e-05
	Glyceric acid	Organic acids	345050	-0.11	0.19	344667	189	135	0.0017829	0.000106318	0.00175119	4.71243e-05	0.00180468	3.97647e-05	0.00147582	5.51703e-05	0.00161207	0.000100984	0.00154149	4.01476e-05	0.00156902	6.43466e-05	0.00181977	2.03763e-05	0.00200913	0.000138401
	Serine	Amino acids	357523	-0.04	0.43	357378	204	151	0.0441858	0.00115445	0.0148385	0.00138185	0.0249753	0.00158816	0.0119334	0.000997456	0.0206538	0.0029656	0.0112497	0.000703159	0.0283415	0.000624088	0.00803527	0.000450171	0.0252481	0.00202824
	Threonine	Amino acids	368365	-0.28	0.43	367335	117	157	0.00612921	0.000173495	0.00231723	0.000163341	0.00360065	0.000235107	0.00178526	9.18641e-05	0.00281866	0.000378232	0.00187628	0.000134286	0.00329928	0.000171673	0.00145348	7.1742e-05	0.00340627	0.000364322
	Fumaric acid	Organic acids	371255	0.36	0.43	372618	115	158	0.00361844	0.000463733	0.00314154	0.000154681	0.0025473	7.32843e-05	0.0026747	0.000120319	0.00228187	0.000100764	0.00225061	9.83865e-05	0.00198788	0.00010667	0.00169788	0.00017451	0.00201893	0.000134226
	Threitol	Polyols	409380	-0.03	0.64	409096	217	194	0.00963168	0.000458818	0.0127977	0.000806636	0.00787757	0.000858957	0.00707838	0.000101678	0.00575031	0.000262837	0.00874541	0.000326275	0.00816969	0.000541697	0.00667397	0.000453064	0.00655701	0.000517534
	Butyric acid	Amino acids	452200	0.13	0.2	452824	174	231	0.0111863	0.00126555	0.00782922	0.00144384	0.00868374	0.00120376	0.00565617	0.000315057	0.00702021	0.000636811	0.00577164	0.000768378	0.00624633	0.000976239	0.00529604	0.00112237	0.00696308	0.000872788
	Aspartic acid	Amino acids	457283	0.06	0.54	457295	202	236	0.0132351	0.000604661	0.00691208	0.000699195	0.0167672	0.000498575	0.00629008	0.000914974	0.0154053	0.00303846	0.00748906	0.000905983	0.010137	0.00113245	0.0038609	0.000419091	0.0115293	0.000900911
	Putrescine	Others	466925	-0.22	0.28	465883	142	245	0.00402912	0.000591401	0.00162546	0.000361204	0.00290767	0.000616556	0.00224484	0.000386818	0.00306905	0.000524375	0.00440542	0.000876067	0.00324147	0.000444134	0.00287639	0.001148	0.00378488	0.000566378
	Hexadecane	Others	485760	0.36	0.67	487754	142	266	0.00348025	0.000187732	0.00192881	0.00031163	0.00292164	0.000517143	0.00220251	0.000275072	0.00279398	0.000527552	0.00350855	0.000603465	0.00244624	0.000289609	0.00223029	0.000698614	0.00279384	0.000418922
	Arabinose	Carbohydrates	494900	-0.27	0.75	493378	103	271	0.0271627	0.00163684	0.170666	0.00913129	0.0790163	0.00176315	0.153839	0.00271352	0.0852465	0.00890763	0.157675	0.00531759	0.0810785	0.000845645	0.11743	0.00473418	0.0869286	0.00155725
	Xylose	Carbohydrates	498150	0.14	0.56	498811	217	276	0.054998	0.00163027	0.27761	0.00562568	0.161944	0.00438051	0.301025	0.00778485	0.183462	0.0179551	0.306423	0.00817765	0.18108	0.00433641	0.272213	0.00612348	0.195452	0.00544288
	Arabitol	Polyols	502470	-0.15	0.33	501787	319	278	0.00227711	5.95634e-05	0.0026382	8.03976e-05	0.00226755	0.000117335	0.00245654	6.62468e-05	0.00214448	0.000100877	0.002705	7.42186e-05	0.00235218	6.73688e-05	0.00245415	5.37123e-05	0.00238725	3.13889e-05
	Pyroglutamic acid	Amino acids	506483	-0.09	0.39	505979	156	281	0.0648738	0.004896	0.0401858	0.0003182	0.0758791	0.00303924	0.0323779	0.00250466	0.0669903	0.00880342	0.022074	0.000415346	0.0511996	0.0021673	0.0171844	0.000731031	0.0524505	0.00286874
	Glutamic acid	Amino acids	507780	-0.02	0.35	507716	128	282	0.0284509	0.000345469	0.017079	0.000393925	0.0363949	0.000881201	0.015667	0.00104851	0.0320806	0.0061195	0.00770461	0.000295174	0.0212778	0.00144581	0.00629814	7.48689e-05	0.0238804	0.0018457
	Rhamnose	Carbohydrates	515530	0.32	0.31	517145	117	290	0.166015	0.00803441	0.148952	0.00781124	0.159316	0.0254239	0.129556	0.00910046	0.187687	0.0141231	0.161558	0.00375891	0.147426	0.0196521	0.151546	0.00990197	0.174178	0.00809633
	Fucose	Carbohydrates	522140	0.03	0.43	522365	117	295	0.0329675	0.00311274	0.029104	0.0011208	0.0290764	0.00240306	0.0244883	0.000262051	0.0315322	0.00183584	0.0285914	0.00144777	0.0271138	0.00143559	0.0293534	0.000590208	0.027471	0.00087514
	Asparagine	Amino acids	550100	-0.03	0.36	549911	116	320	0.133933	0.0070972	0.0423831	0.0100859	0.0612947	0.0152108	0.0441919	0.005225	0.0537368	0.0138655	0.0741358	0.0193146	0.0422762	0.00439152	0.0334976	0.0108457	0.0458672	0.00751555
	Glucosone	Carbohydrates	558110	-0.04	0.24	557859	231	326	0.00758746	0.000532475	0.00520703	0.000271708	0.00529713	0.000467767	0.00493806	0.000249096	0.00518377	0.000326282	0.00549978	0.000559939	0.00505215	0.000229109	0.00457528	0.000804275	0.00528488	0.000198235
	Mannopyranoside	Carbohydrates	558940	0.35	0.26	560885	133	327	0.00396039	0.000103216	0.00261509	6.38286e-05	0.00272913	0.000177524	0.0025421	4.00494e-05	0.00282275	0.000124013	0.00236189	0.000138823	0.00288211	0.000144458	0.00234903	0.000191334	0.0032751	8.95308e-05
	Quinic acid	Organic acids	577930	0.01	0.35	577986	345	340	0.0424363	0.0065584	0.0294088	0.00264889	0.0256781	0.0034524	0.0255352	0.00190571	0.0200426	0.00328413	0.0279659	0.00153649	0.0225363	0.00231683	0.0326697	0.00408285	0.0150412	0.00131243
	Sorbose	Carbohydrates	586190	0.08	0.52	587955	307	345	0.331545	0.0162898	0.339086	0.0263979	0.291447	0.00682651	0.283669	0.0120689	0.339971	0.0211132	0.320896	0.0266807	0.334674	0.0247008	0.291558	0.019318	0.309395	0.00830487
	Dehydroascorbic acid	Others	624990	0.09	0.45	625822	157	358	0.0130455	0.000284147	0.0151475	4.15187e-05	0.014401	0.000434766	0.0138073	0.00059844	0.0144559	8.33362e-05	0.0158129	0.000874045	0.0126782	0.000232896	0.018923	0.00155767	0.0132703	0.000737444
	Gulonic acid	Others	640190	0.04	0.27	640104	217	367	0.0329152	0.000896595	0.0328606	0.00178041	0.0268924	0.000972724	0.0253705	0.00118279	0.0228921	0.00020524	0.0250334	0.00106182	0.0223575	0.00106239	0.0204844	0.00192954	0.0218901	0.00114771
	Myoinositol	Polyols	653910	0.16	0.71	654265	305	382	0.028815	0.0014336	0.031307	0.00089754	0.0290901	0.000530517	0.0304079	0.00061309	0.0320367	0.000752398	0.0331482	0.000159428	0.035527	0.000658003	0.032864	0.00030021	0.0372952	0.000392695
	Glucaric acid	Others	660120	0	0.34	660148	217	387	0.0589697	0.00347939	0.0481729	0.00346282	0.031778	0.00261819	0.0264012	0.00110989	0.0198599	0.00139516	0.0218342	0.00170295	0.0166012	0.000453408	0.0140774	0.000875689	0.0157198	0.00141867
	Lactulose	Carbohydrates	858670	0.16	0.43	860410	169	550	0.0124602	0.00103745	0.00902293	0.00100406	0.00837101	0.000703583	0.00813194	0.00052139	0.00823455	0.000607837	0.00769867	0.000652407	0.0089494	0.00102464	0.00595268	0.00116537	0.009848	0.000419479
	Lactitol	Polyols	862390	0.46	0.29	866331	361	560	0.00672415	0.000804905	0.00445161	0.000500715	0.00367726	0.000392234	0.00382186	0.000290245	0.0035502	0.000296729	0.0036821	0.000166843	0.00388408	0.00039042	0.00314838	0.000378618	0.00457144	0.00022997
	Turanose	Carbohydrates	876710	0.27	0.32	879060	217	579	0.0615615	0.00352232	0.0786493	0.00387148	0.0675893	0.0020225	0.0697304	0.00190864	0.0639116	0.00110245	0.0717009	0.00181567	0.0688454	0.00219398	0.0616067	0.00284274	0.0703778	0.00210339
	Maltose	Carbohydrates	887905	-0.12	0.55	886848	361	586	0.00405412	0.000319459	0.0038989	0.000147003	0.00347678	0.000144673	0.00358634	0.0001944	0.00364394	9.07368e-05	0.00350987	6.63693e-05	0.00373149	0.000129072	0.0031703	0.000141834	0.00427016	5.29555e-05
	Maltitol	Polyols	889040	0.05	0.1	889518	204	587	0.00720072	5.70946e-05	0.00660591	0.000492898	0.00652784	0.000154127	0.00568972	0.000296499	0.00588375	0.000257454	0.00598737	6.88406e-05	0.00568681	0.000356122	0.0063233	0.000264322	0.00665827	0.000380277
	Kestose	Carbohydrates	1033400	-0.02	0.26	1033082	169	692	0.0069638	0.000595619	0.0126896	0.000797369	0.0227009	0.000969258	0.0175053	0.000959156	0.0214899	0.0020071	0.00563868	0.000442426	0.0149217	0.00102163	0.00751828	0.000630804	0.0195772	0.000414049
	Raffinose	Carbohydrates	1033367	0.37	0.35	1037483	217	694	0.00902103	0.000796927	0.0153639	0.00105374	0.0133345	0.00124589	0.0139155	0.000380962	0.0136206	0.000716761	0.011119	0.000741739	0.0136326	0.000743881	0.0114173	0.000781757	0.0150336	0.000238329
	Triacontanoic acid	Others	1121400	0.02	0.11	1121675	117	743	0.00046722	0.000107078	0.00065302	9.88793e-05	0.000460889	2.22563e-05	0.00103428	0.000321879	0.00147312	0.000644771	0.00118868	0.000250375	0.00127937	0.000166689	0.00116648	0.000180312	0.000887618	4.66468e-05
	Malic acid	Organic acids	440995	-0.01	0.39	440995	233	160	4.64793	0.140104	2.46269	0.305592	2.07891	0.0226558	2.77516	0.24241	2.3493	0.247272	2.57887	0.22619	1.94228	0.179978	2.15874	0.502843	2.0986	0.0805724
	Fructose	Carbohydrates	579380	0	0.55	579380	217	245	34.7737	0.741519	40.1781	0.194258	39.2222	1.51983	43.0042	1.16397	44.7028	1.47054	46.0007	1.75447	45.9931	1.31871	42.0003	3.96266	47.9354	1.59138
	Sorbitol	Polyols	588295	0.18	0.34	589355	217	253	33.9078	0.537209	39.0334	0.13393	37.7688	1.31224	41.8361	1.18094	43.5518	1.61584	44.4569	1.71022	45.3713	1.2502	41.2826	4.02489	46.7899	1.63035
	Citric acid	Organic acids	592883	0.12	0.45	593751	183	255	0.266715	0.0228096	0.321161	0.0135499	0.380763	0.00430463	0.320568	0.0033356	0.433024	0.0148851	0.356363	0.0287476	0.380452	0.015986	0.353226	0.0228442	0.379416	0.0143487
	Talose	Carbohydrates	593440	0.02	0.58	593683	229	255	0.761251	0.0614024	0.983773	0.0376225	1.33428	0.0139237	1.02286	0.00983162	1.4524	0.0239628	1.11127	0.0882401	1.1602	0.017325	1.13705	0.0693572	1.19343	0.0451918
	Glucose	Carbohydrates	598880	-0.01	0.67	598880	160	261	19.7041	0.901856	22.8968	0.630739	22.5384	1.00763	23.2669	0.351454	25.3218	1.14317	24.6773	1.23332	25.8666	0.454601	22.0447	1.23629	25.0916	0.642888
	Sucrose	Carbohydrates	840783	0	0.51	840783	437	373	1.7368	0.0366325	1.37455	0.0193977	1.32826	0.0638678	1.39989	0.0480572	1.55883	0.0288994	1.33319	0.10214	1.6259	0.0285012	1.24934	0.0806363	1.74418	0.0921662
